# Supplementary material for: Viral Infection Increases Glucocorticoid-Induced Interleukin-10 Production through ERK-Mediated Phosphorylation of the Glucocorticoid Receptor in Dendritic Cells: Potential Clinical Implications
Source: PLOS journal article supplement (doi:10.1371/journal.pone.0063587), 2013-05-08
Supplement: S4 (10.1371/journal.pone.0063587.s004) [file journal.pone.0063587.s004]

**Supplemental Table 3. The effect of MCMV infection and dexamethasone treatment on the formation of focal inflammatory sites in the liver.**

| Treatment  | Number of inflammatory sites (/0.1 m <sup>2</sup> liver) |       |
|------------|----------------------------------------------------------|-------|
|            | Mean                                                     | S.E.  |
| Control    | 0.20                                                     | 0.21  |
| DEX        | 0.33                                                     | 0.23  |
| MCMV       | 133.20                                                   | 14.41 |
| DEX + MCMV | 79.40*                                                   | 9.59  |

\*: p=0.036 (n=3), compared to MCMV treatment.
